# Supplementary material for: JNK–NQO1 axis drives TAp73-mediated tumor suppression upon oxidative and proteasomal stress
Source: PubMed Central journal article supplement (PMC4649515; doi:10.1038/cddis.2014.408), 2014-10-23

**Supplementary Figure 1**

**A**

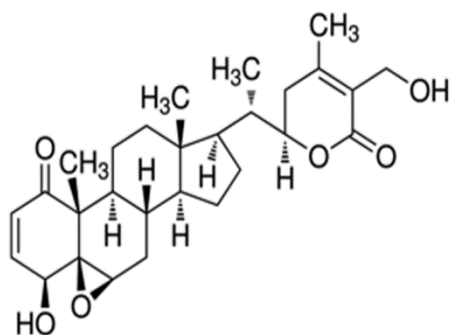

5,6-epoxy-4,22,27-trihydroxy-1-oxoergosta-  
2,24-dienoic acid delta-lactone  
(withaferin A)

**B**

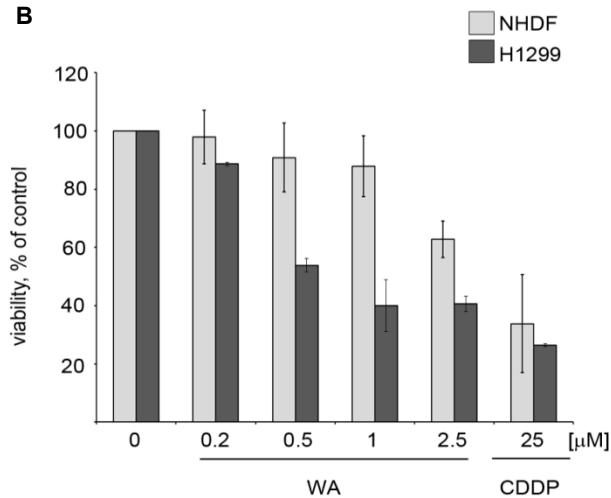

**C**

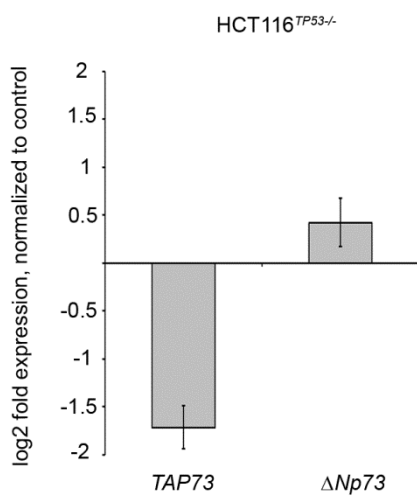

**D**

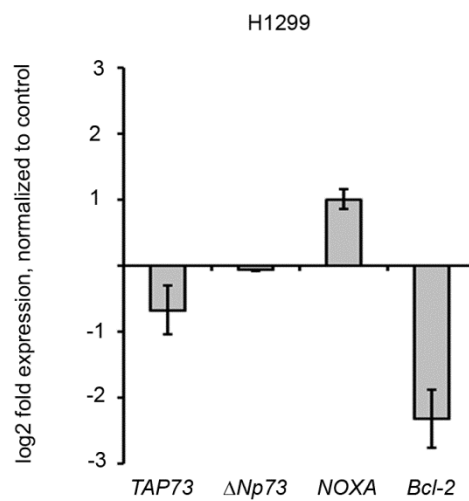

**E**

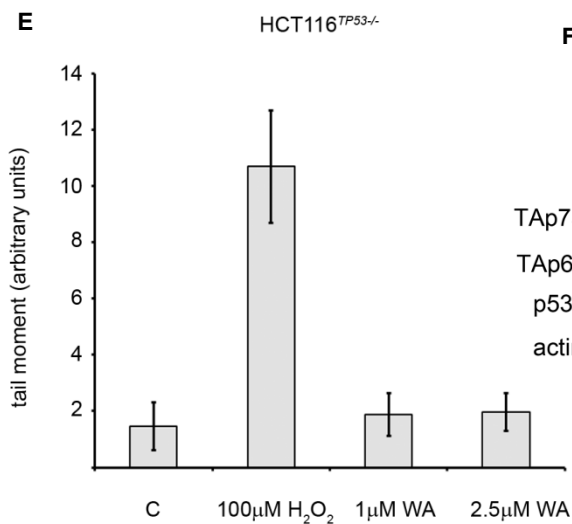

**F**

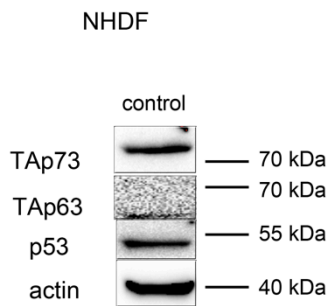

**G**

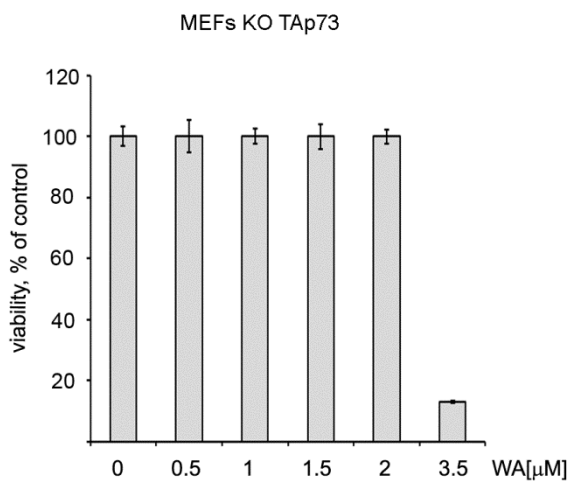

**Supplementary Figure 2**

**A**

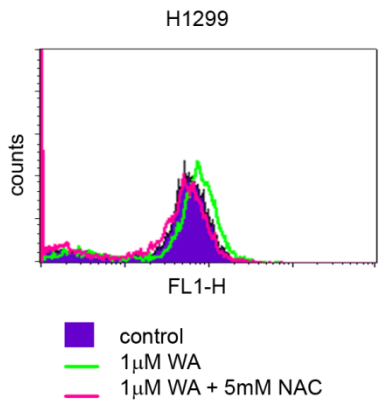

**B**

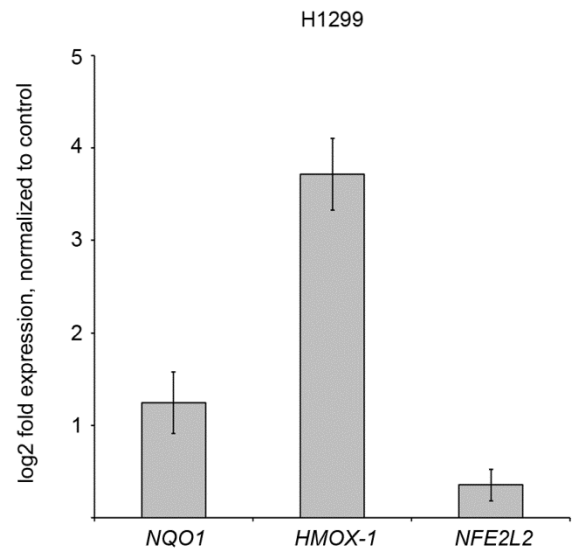

**C**

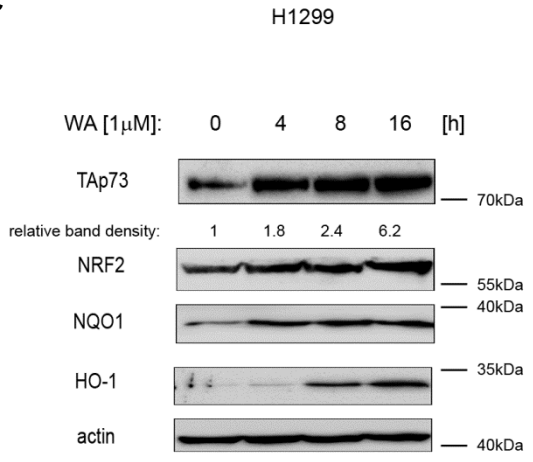

**D**

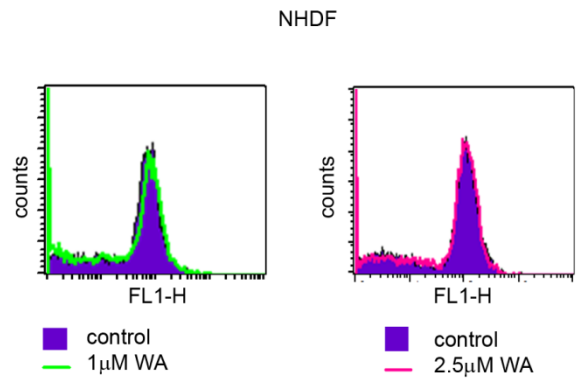

# Supplementary Figure 3

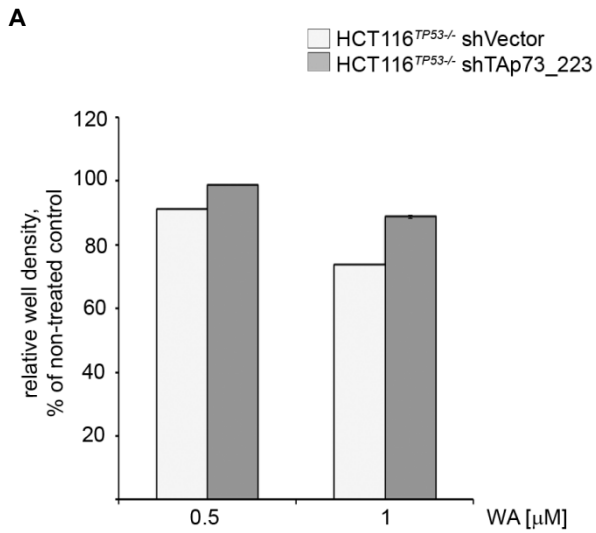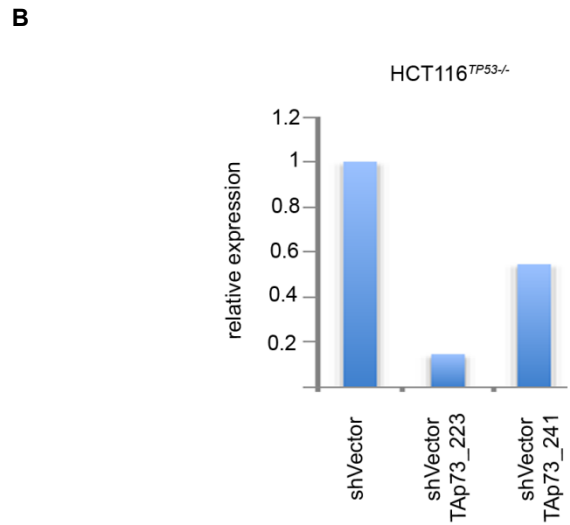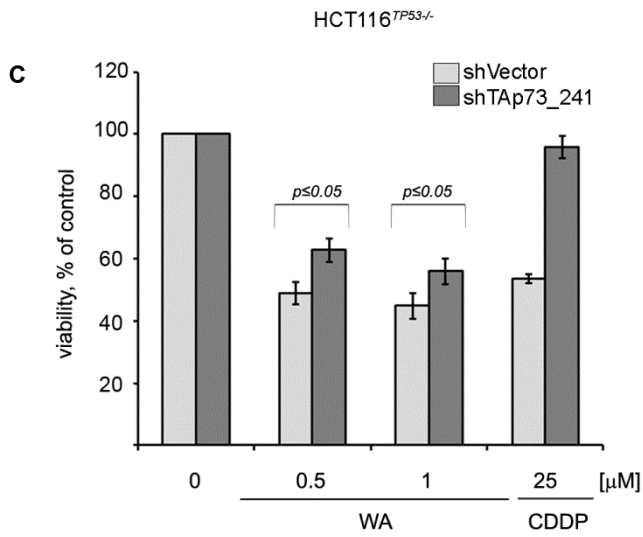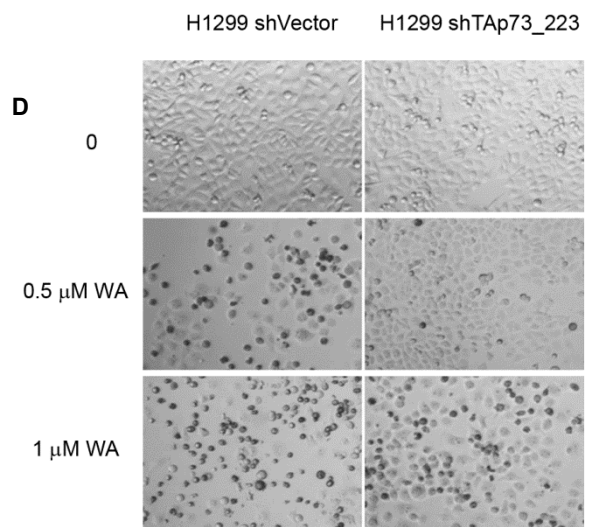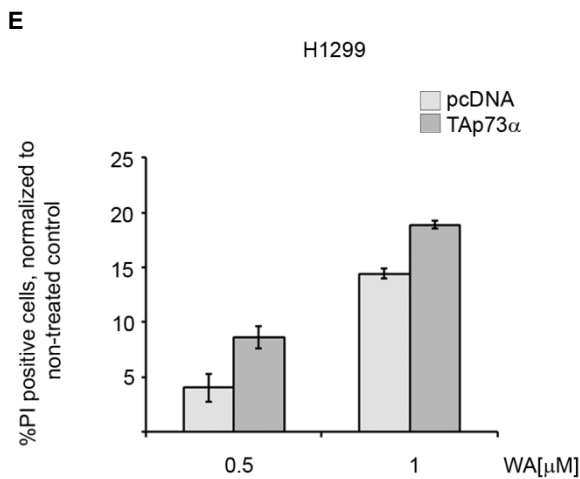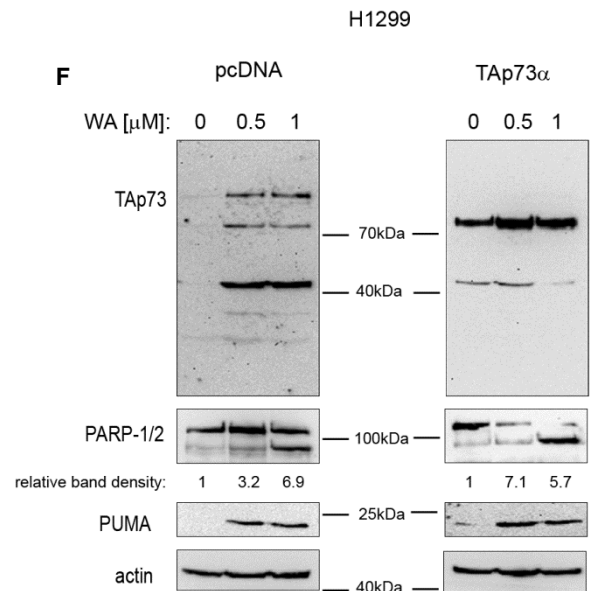

**Supplementary Figure 4**

**A**

HCT116<sup>TP53-/-</sup>

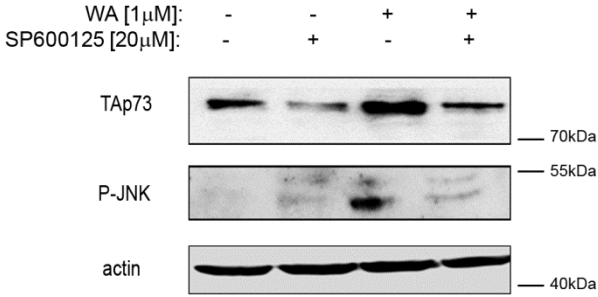

**B**

HCT116<sup>TP53-/-</sup>

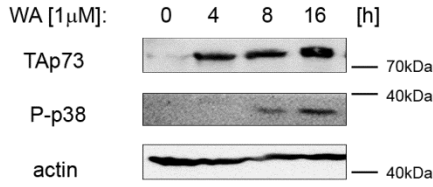

Supplementary Figure 5

A

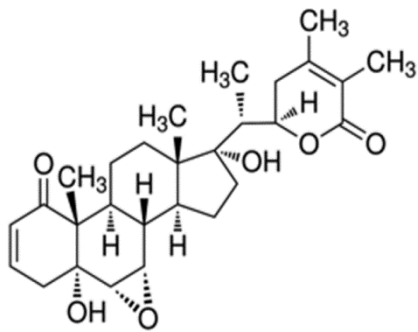

(5a,6a,7a,22R)-6,7-Epoxy-5,17,22-trihydroxy-1-oxoergosta-2,24-dien-26-oic acid d-lactone (withanone)

B

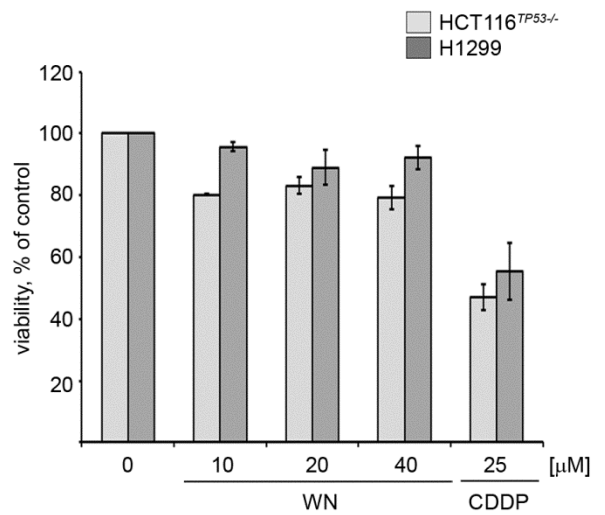

C

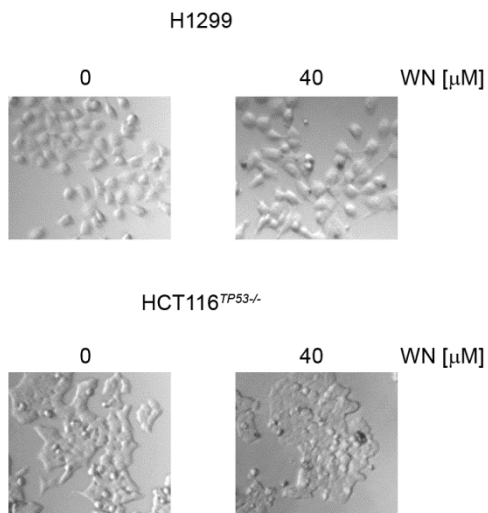

D

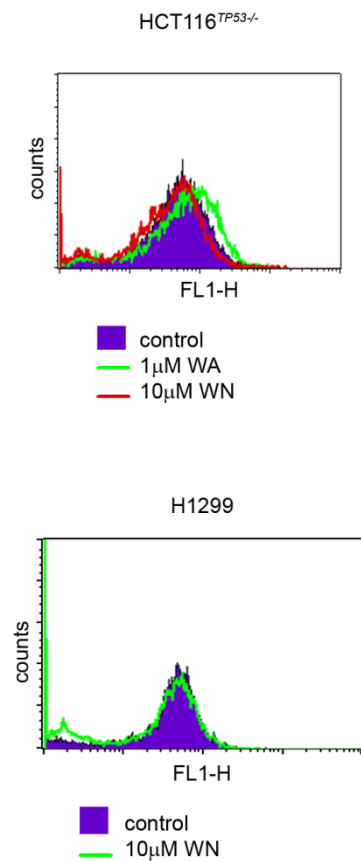

**Supplementary Figure 6**

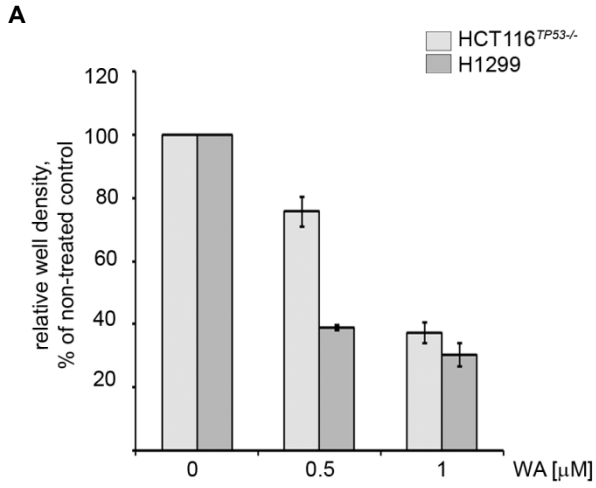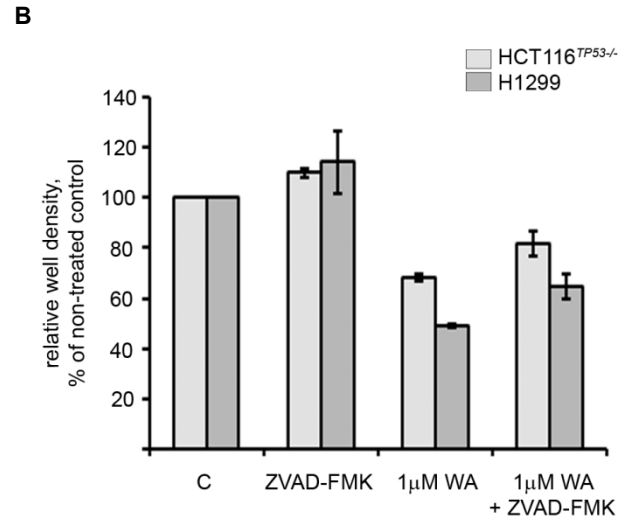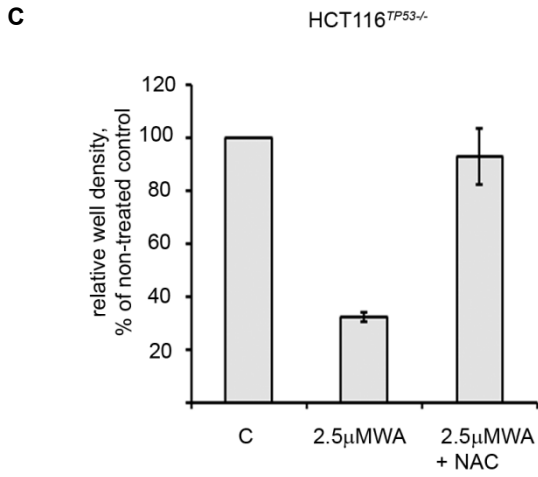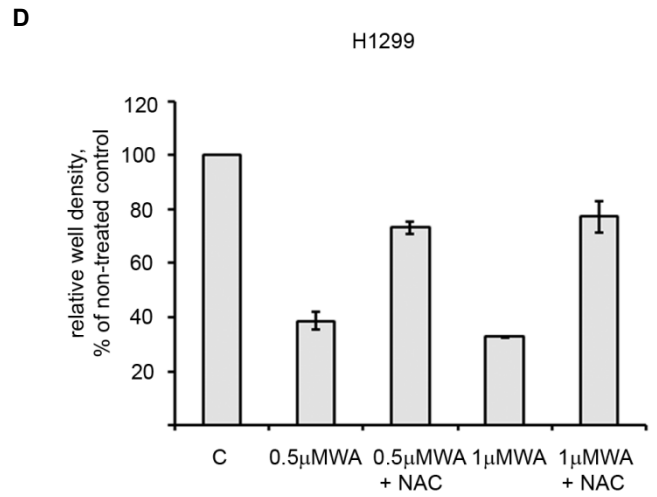

Supplementary Figure 7

A

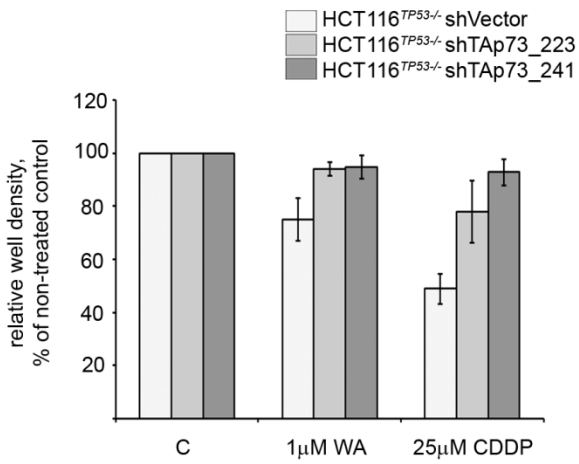

B

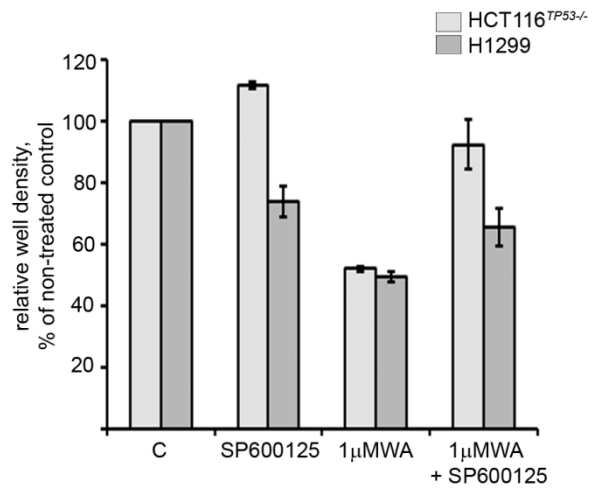

C

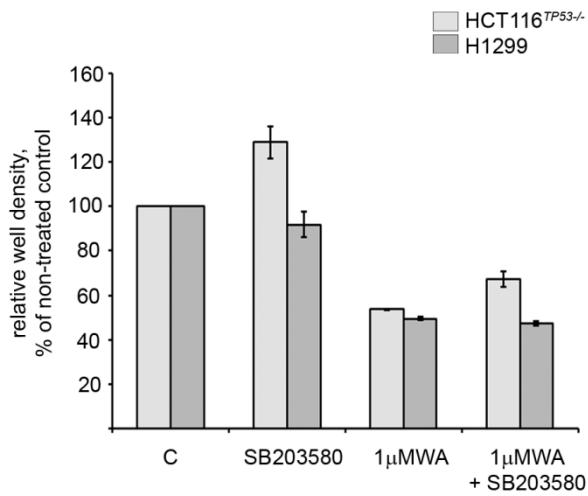

Supplement: cddis2014408x1.pdf [file cddis2014408x1.pdf]
